# Supplementary material for: Characterizing Advanced Parkinson's Disease: Romanian Subanalysis from the OBSERVE-PD Study
Source: Parkinsons Dis. 2021 Jan 25;2021:6635618. doi: 10.1155/2021/6635618 (PMC7850828; doi:10.1155/2021/6635618)
Supplement: Supplementary Materials — contain three supplementary tables. Table S1. Comorbidities. Table S2. Disease status and characteristics. Table S3. DAT eligibility—patients and characteristics. [file 6635618.f1.zip]

Archive with 3 entries (3 files):
- 6635618.f1/Suppl Table S1.docx
- 6635618.f1/Suppl Table S2.docx
- 6635618.f1/Suppl Table S3.docx
